# Supplementary material for: Monitoring the Heavy Metal Lead Inside Living Drosophila with a FRET-Based Biosensor
Source: MDPI journal article supplement (doi:10.3390/s20061712), 2020-03-19
Supplement: s1 [file s1]

## Supporting Information

# Monitoring the Heavy Metal Lead Inside Living *Drosophila* with a FRET-Based Biosensor

De-Ming Yang <sup>1,2,3,#,\*</sup>, Robeth Viktoria Manurung <sup>4,#</sup>, Yu-Syuan Lin <sup>2</sup>, Tai-Yu Chiu <sup>2</sup>, Wei-Qun Lai <sup>1,2</sup>, Yu-Fen Chang <sup>5</sup> and Tsai-Feng Fu <sup>6</sup>

<sup>1</sup> Microscopy Service Laboratory, Basic Research Division, Department of Medical Research, Taipei Veterans General Hospital, Taipei 11217, Taiwan; willie@gm.ym.edu.tw

<sup>2</sup> Institute of Biophotonics, School of Medical Technology & Engineering, National Yang-Ming University, Taipei 11221, Taiwan; f1288197@yahoo.com.tw (Y.-S.L.); taiyu.chiu@nhri.org.tw (T.-Y.C.)

<sup>3</sup> Biophotonics and Molecular Imaging Research Center (BMIRC), National Yang-Ming University, Taipei 112, Taiwan

<sup>4</sup> Research Center for Electronics and Telecommunication, Indonesian Institute of Sciences (LIPI), 40135 Bandung, Republic of Indonesia; robe007@lipi.go.id

<sup>5</sup> LumiSTAR Biotechnology, Inc., Taiwan; yu-fen.chang@lumistar.com.tw

<sup>6</sup> Department of Applied Chemistry, National Chi-Nan University, Nantou 54561, Taiwan; tffu@ncnu.edu.tw

\* Correspondence: dmyang@vghtpe.gov.tw

# Co-first author to this work.

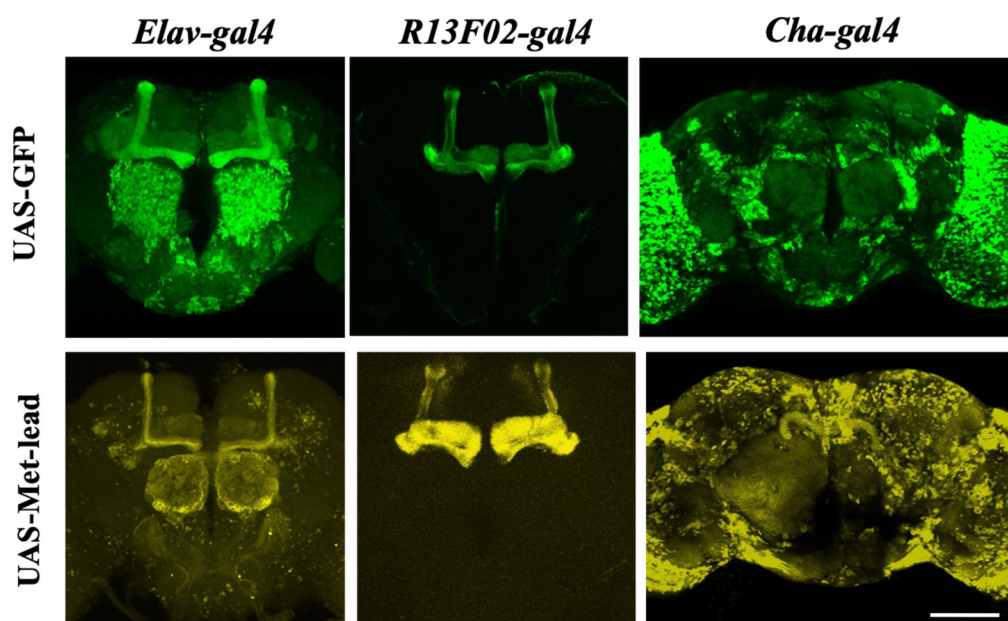

**Supplementary Figure S1.** Expression pattern of GFP and Met-lead on adult *Drosophila* brain. Different types of neurons expressing GFP (upper part, e.g., *Elav-gal4* > *UAS-GFP*; *R13F02-gal4* > *UAS-GFP*; and *Cha-gal4* > *UAS-GFP*) or expressing Met-lead (lower part, e.g., *Elav-gal4* > *Met-lead*; *R13F02-gal4* > *UAS-Met-lead*; and *Cha-gal4* > *UAS-Met-lead*) were taken under confocal microscope for 3D imaging. The scale bar is 50  $\mu\text{m}$ .

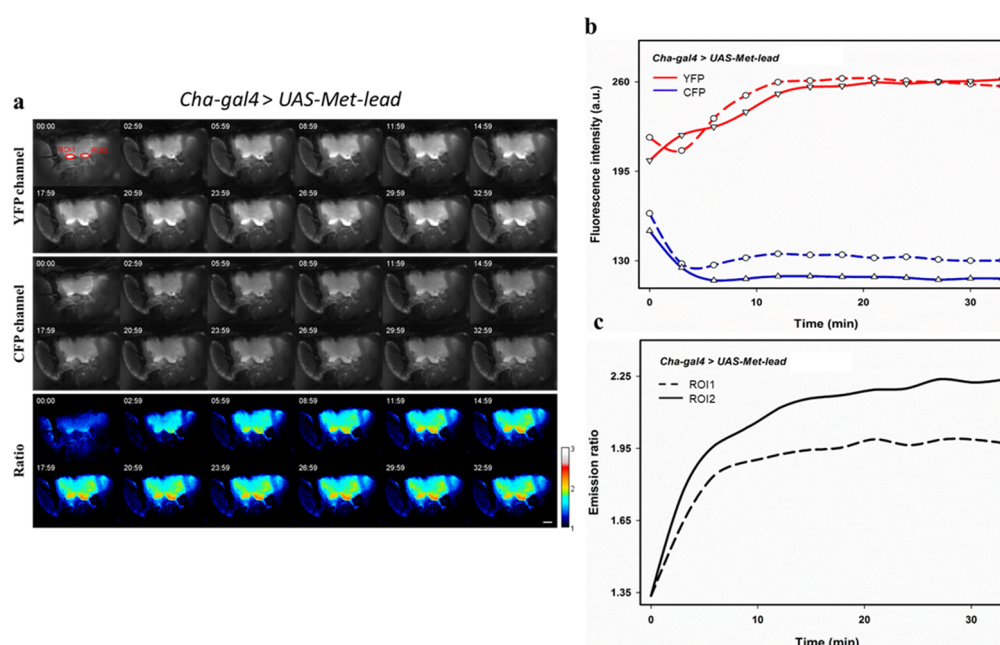

**Supplementary Figure S2.** Practical applications of Met-lead on adult *Drosophila* brain with lower magnification (4x, compared with Figure 4 in 20x). (a) The in vivo lead bio-sensing of *Drosophila* (*Cha-gal4* > *UAS-Met-lead*) was carried out under an upright FRET image platform. During a 30 sec recording, a buffer containing lead ions (10  $\mu\text{M}$ ) and ionomycin (5  $\mu\text{M}$ ) was added. The representative fly brain (cholinergic neurons) images of YFP channel (12 graphs numbered with the time point in min, upper), CFP channel (middle), and ratio (YFP/CFP, bottom) are shown. The rainbow color images were transformed through a ratio image process. (b,c) The time-lapse plots from selected regions are displayed as fluorescent intensities, FIs (YFP in red lines; CFP in blue lines (b)) and emission ratios (c). In panel (a), the scale bar is 50  $\mu\text{m}$  and the rainbow color ratio bar is from 1 to 3.

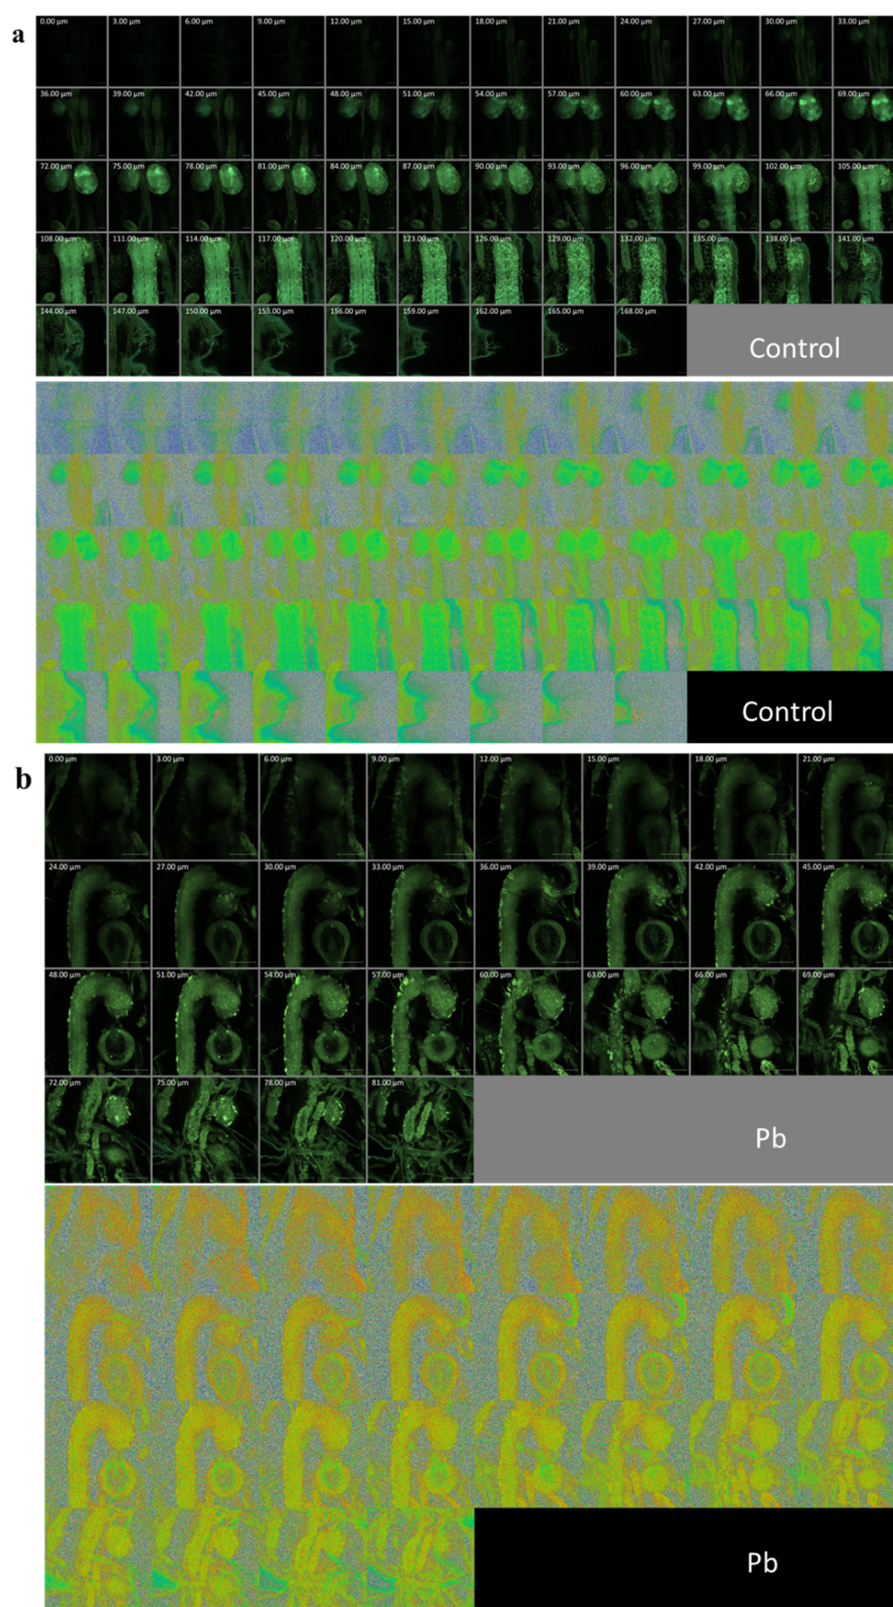

**Supplementary Figure S3.** The CY montage images of Met-lead within larva CNS of *Drosophila*. Control (upper) and lead (lower) CNS are shown in different optical sections in RG merged manner or in ratio color one (ratio color bar from  $-0.5$  to  $2.8$ ).
